# Supplementary material
Source: PubMed Central journal article supplement (PMC5552418)

Figure S1

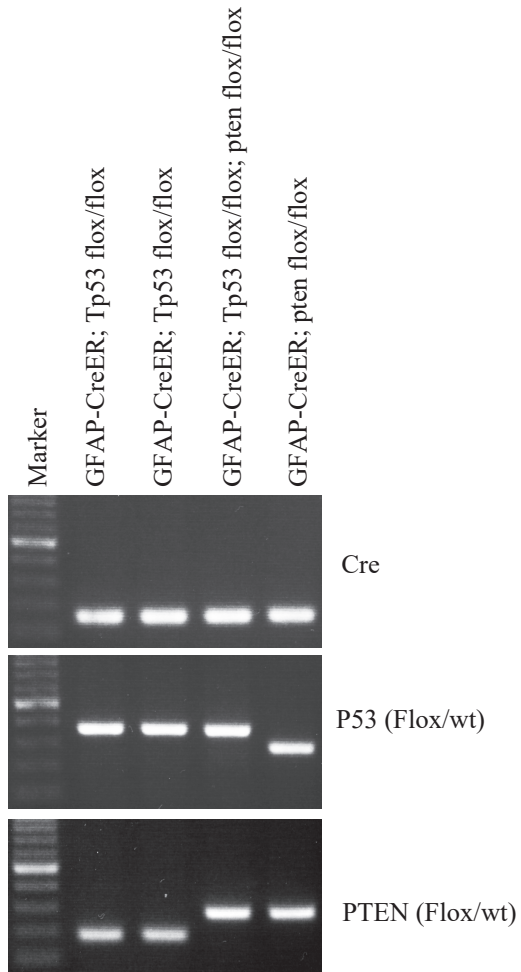

Supplement: NIHMS852365-supplement-2.pdf [file NIHMS852365-supplement-2.pdf]

Figure S2

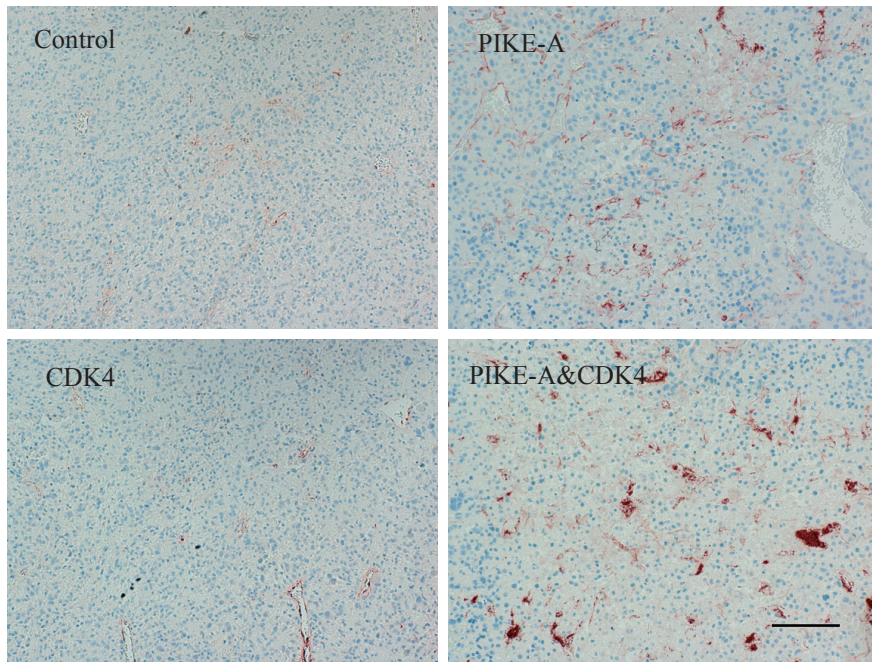

Supplement: NIHMS852365-supplement-3.pdf [file NIHMS852365-supplement-3.pdf]

Figure S3

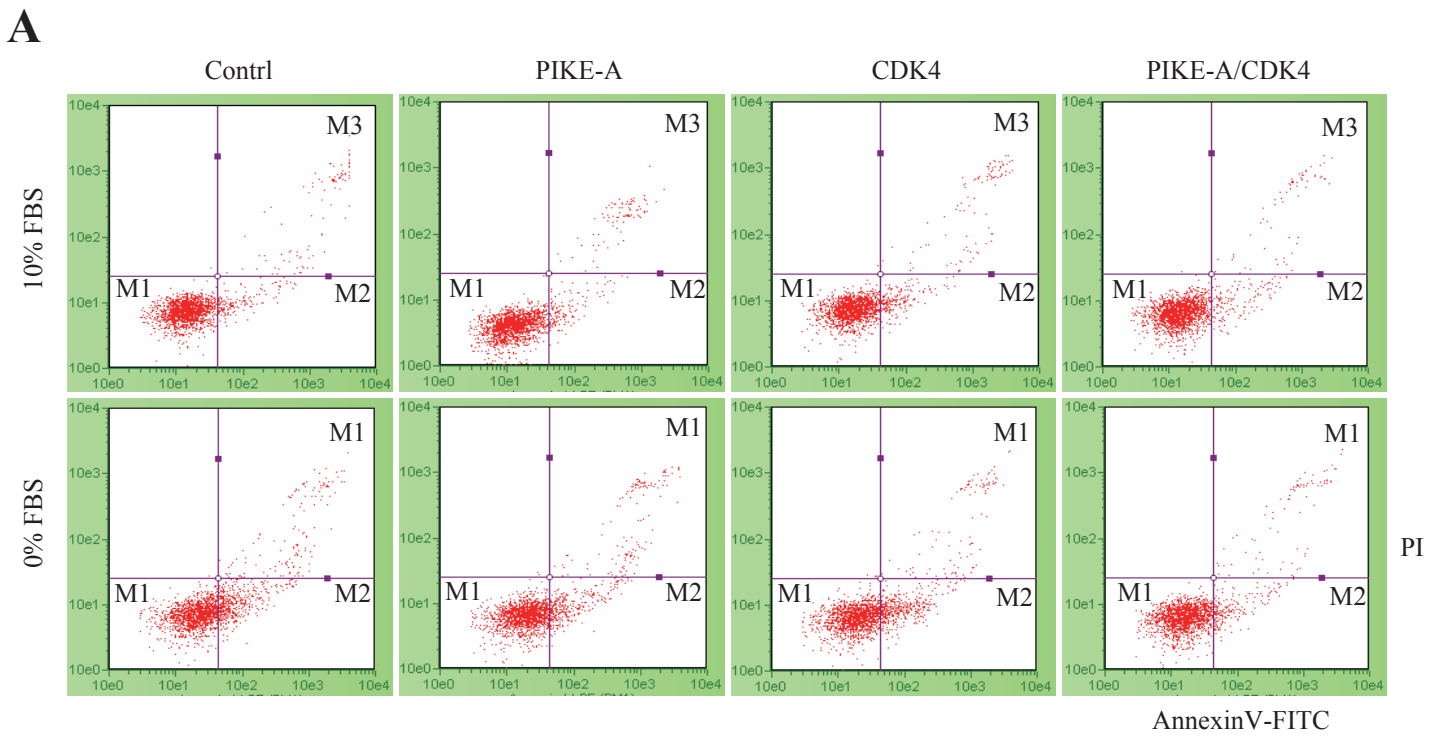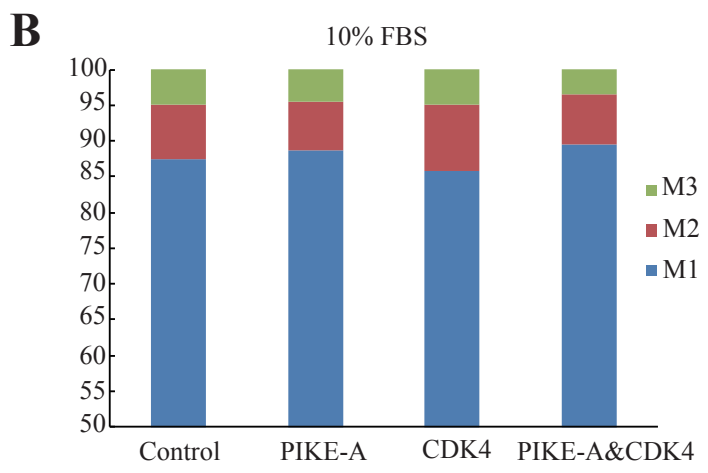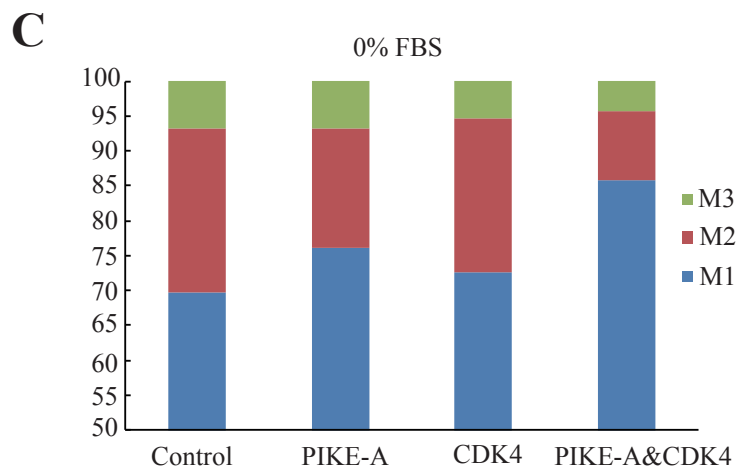

Supplement: NIHMS852365-supplement-4.pdf [file NIHMS852365-supplement-4.pdf]

Figure S4

**A**

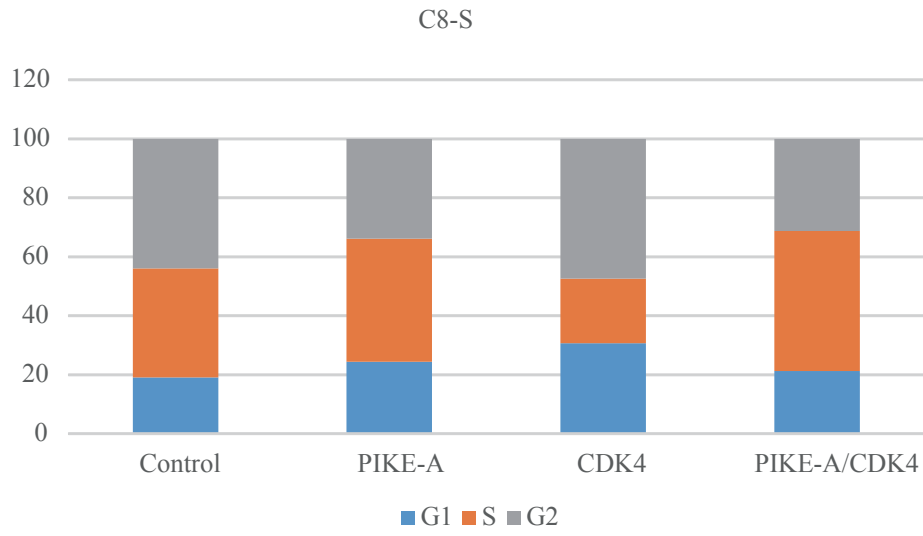

**B**

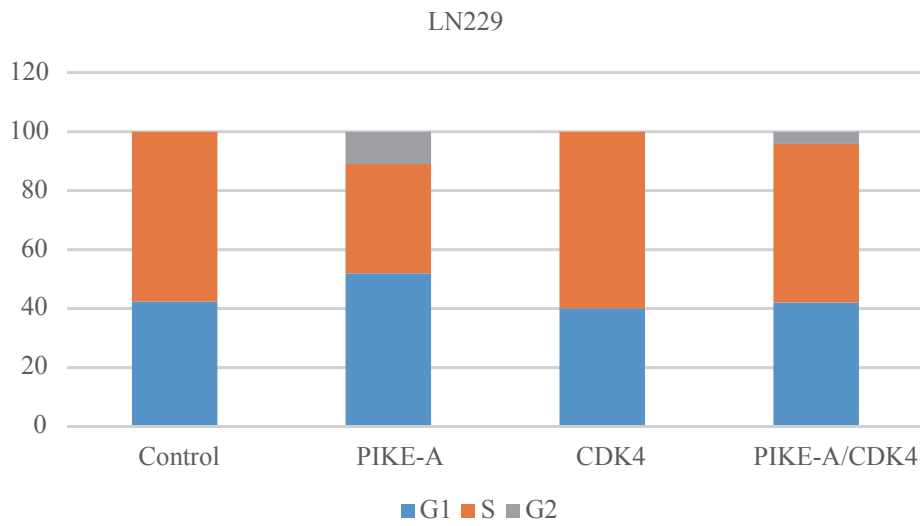

Supplement: NIHMS852365-supplement-5.pdf [file NIHMS852365-supplement-5.pdf]

Figure S5

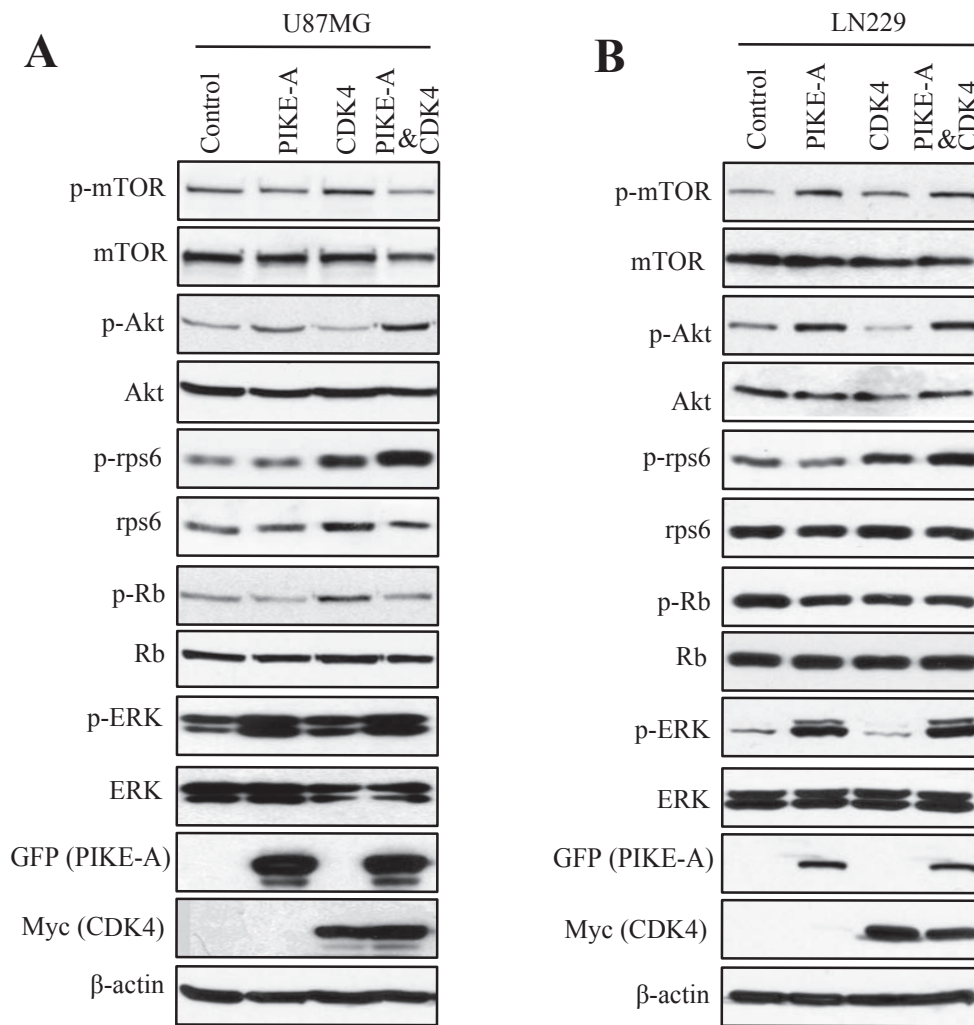

Supplement: NIHMS852365-supplement-6.pdf [file NIHMS852365-supplement-6.pdf]

Figure S6

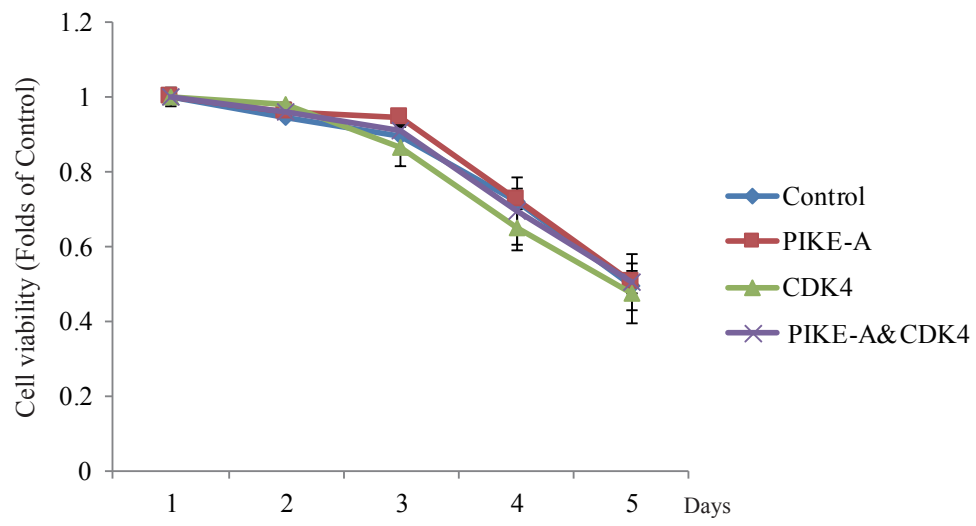

Supplement: NIHMS852365-supplement-7.pdf [file NIHMS852365-supplement-7.pdf]
